# Supplementary material for: In vitro model of retinoblastoma derived tumor and stromal cells for tumor microenvironment (TME) studies
Source: PubMed Central journal article supplement (PMC11655973; doi:10.1038/s41419-024-07285-2), 2024-12-18
Supplement: 41419_2024_7285_MOESM1_ESM.pdf [file 41419_2024_7285_MOESM1_ESM.pdf]

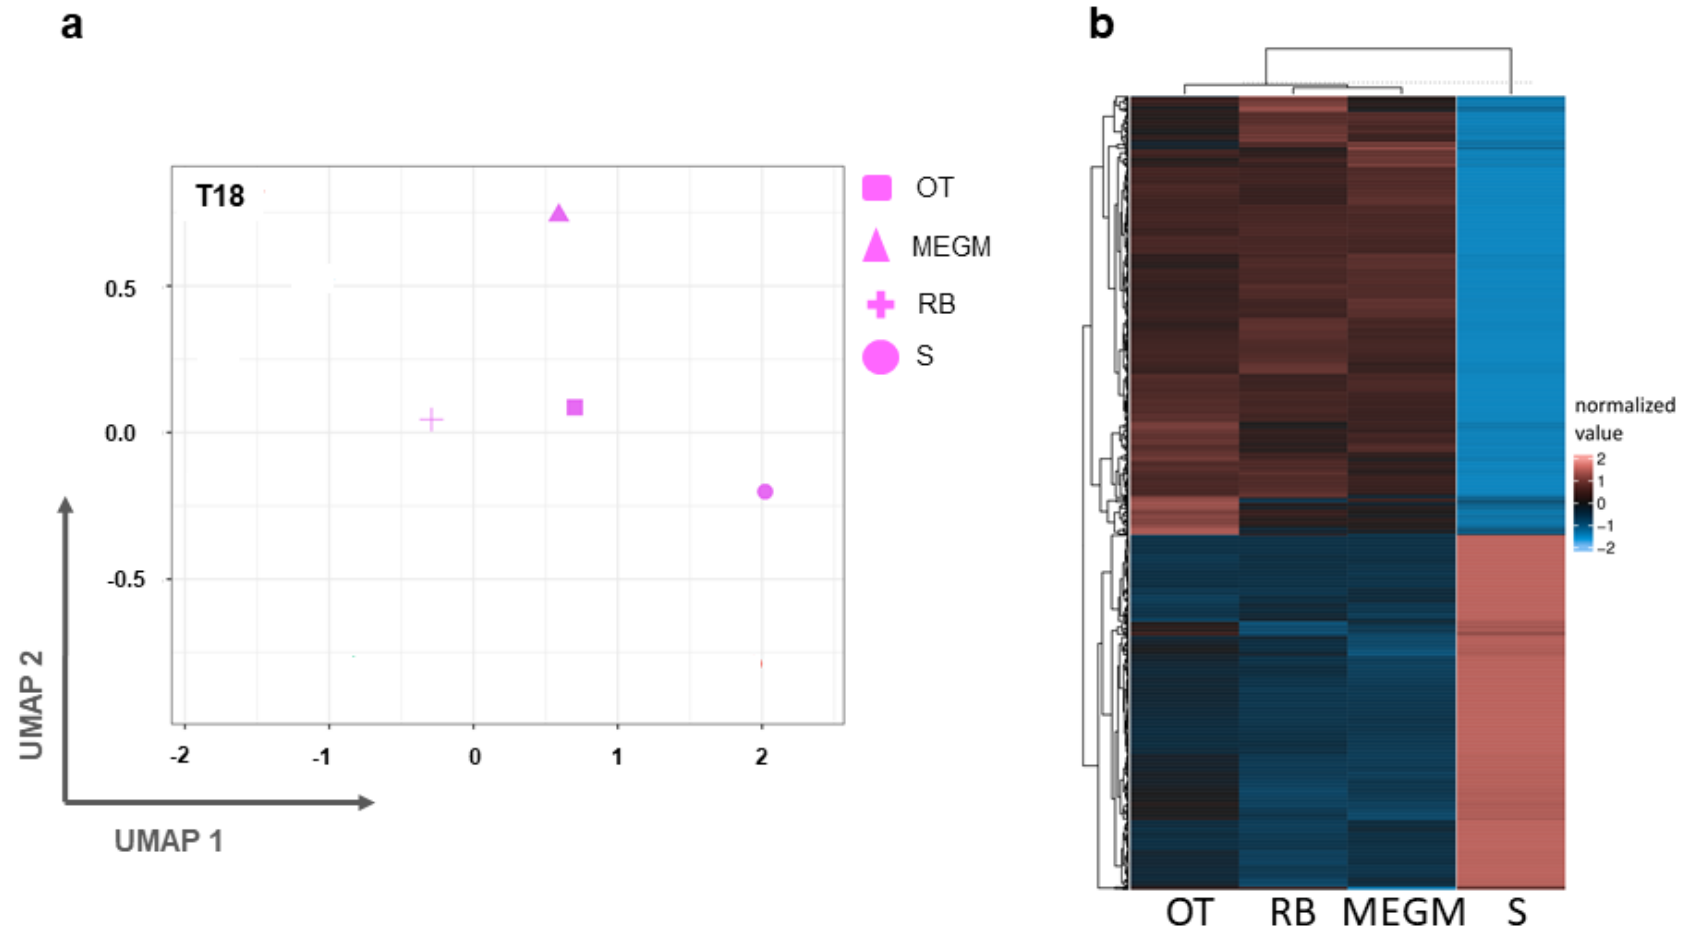

**Supplementary Figure 1.** UMAP and heatmap analysis of T18. (a) UMAP analysis of the original tumor (OT), primary RB cells in MEGM and RB medium and RB derived stromal cells (S) of T18 displayed a separation of the stromal cells. (b) Heatmap of significantly up- and down-regulated DEGs with a minimum fold change of 1.5.

**a**

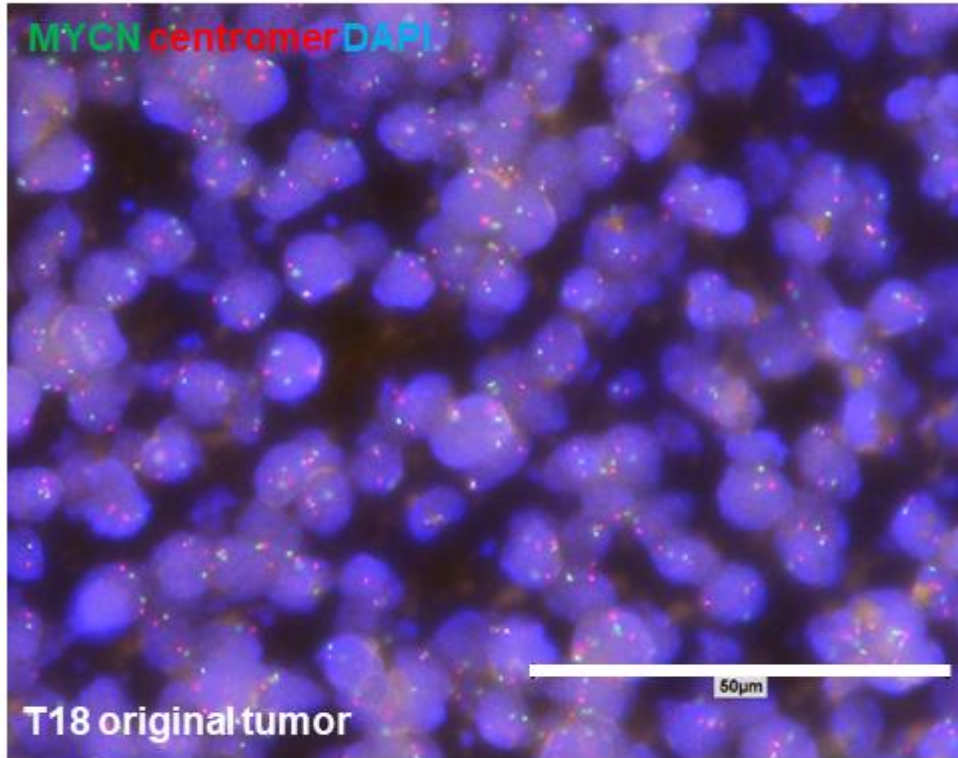

**b**

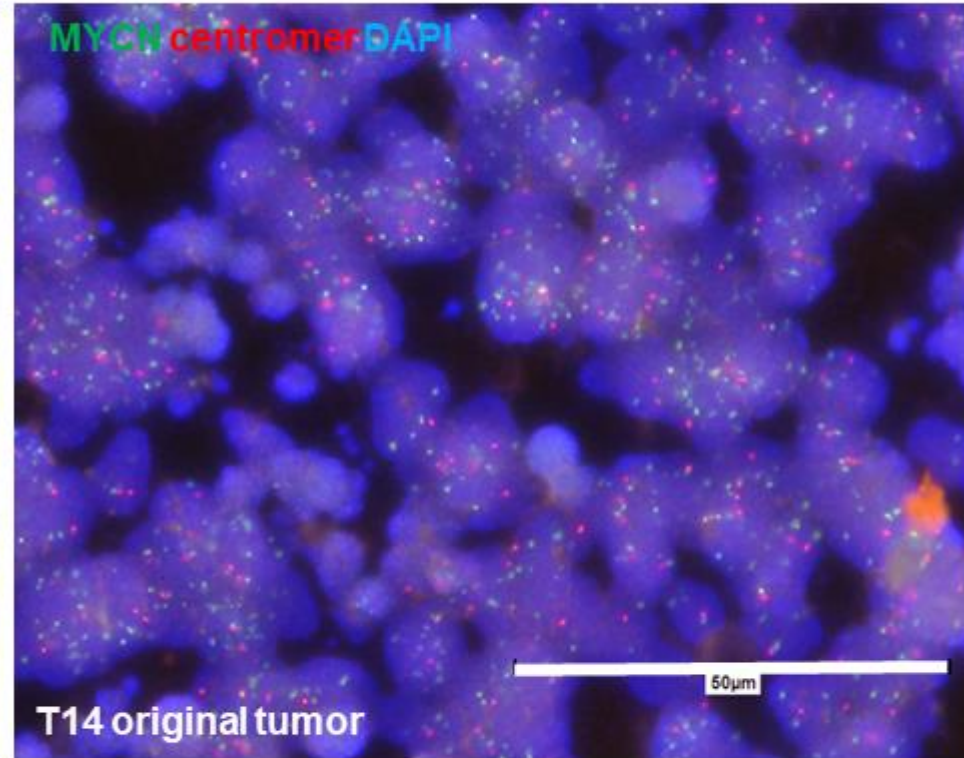

**Supplementary Figure 2.** MYCN FISH analysis of the original RB tumor T18 without MYCN amplification (a) and MYCN amplified T14 original RB tumor (b) (scale bars: 50µm).

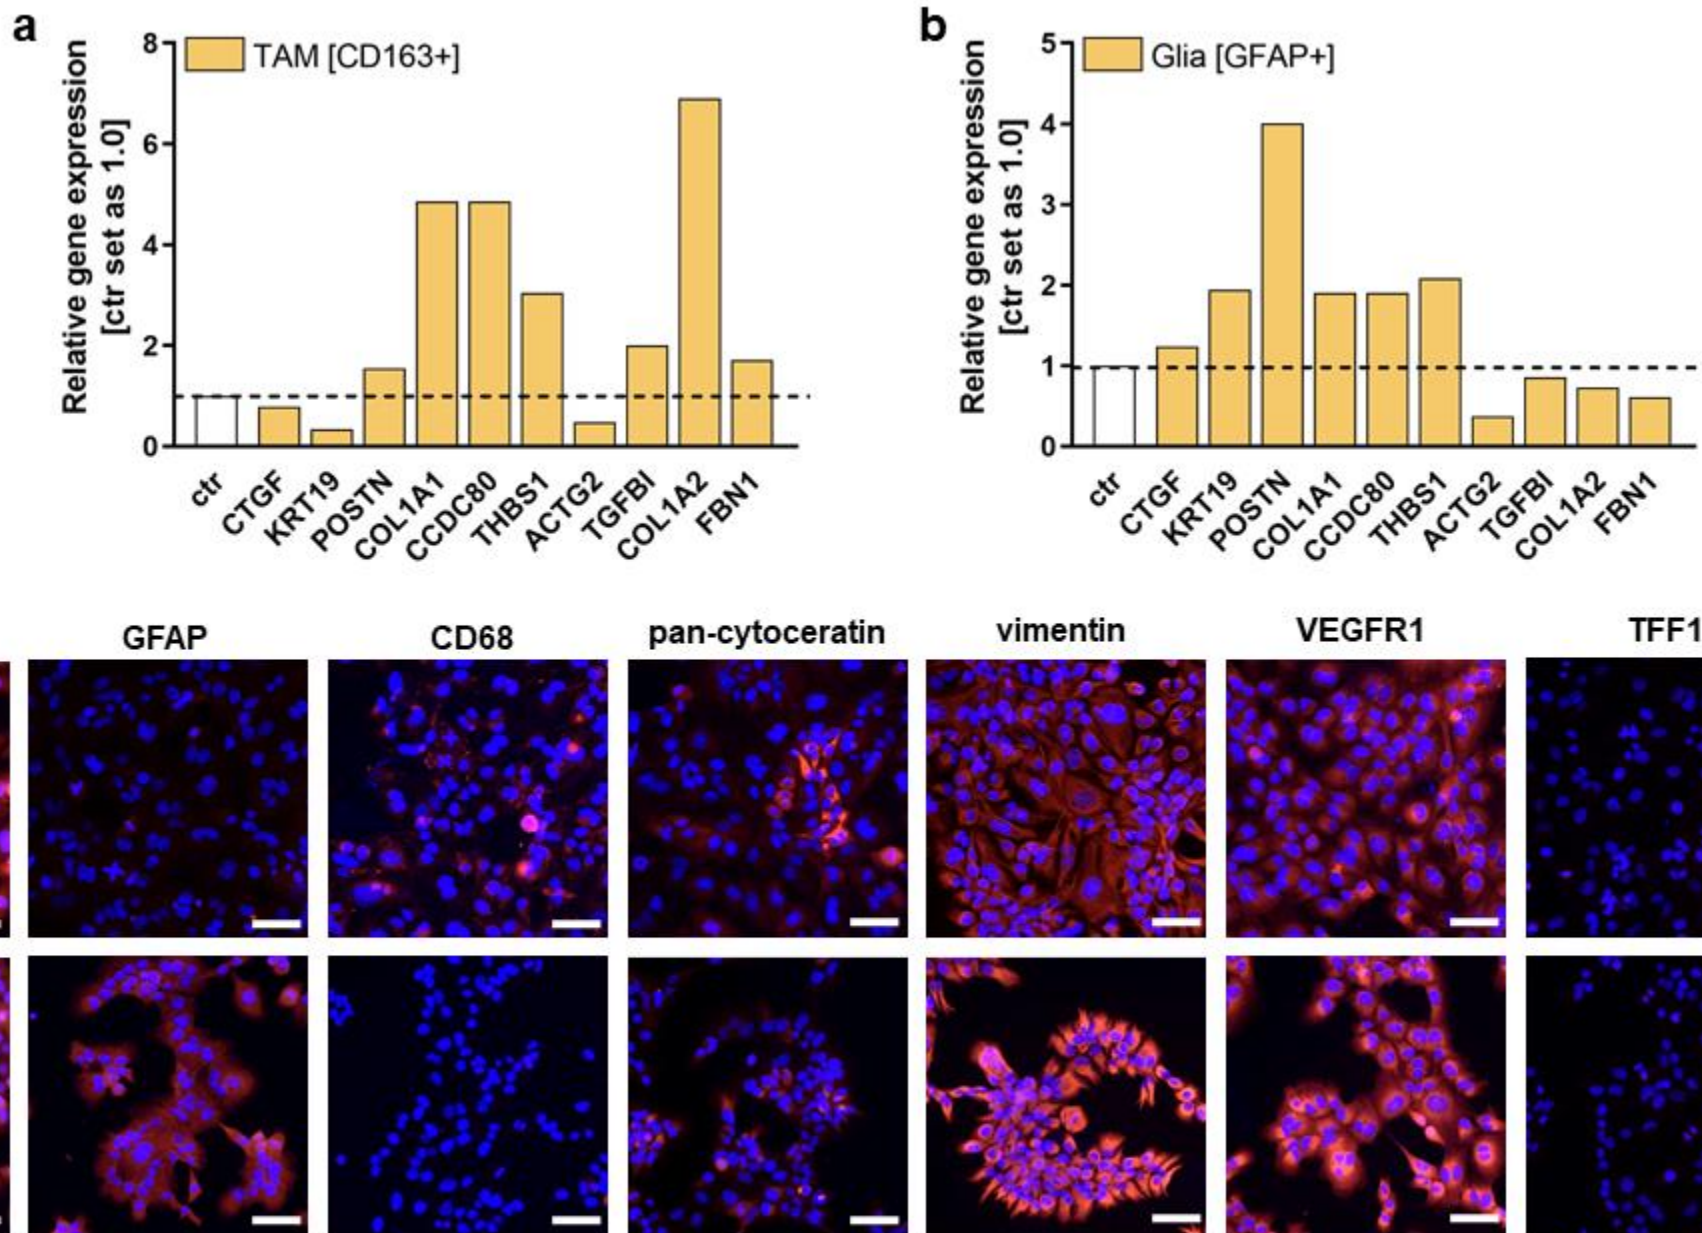

**Supplementary Figure 3.** Relative expression levels of genes defined as the "stromal marker set" analyzed in MACS separated stromal subpopulations of TAMs (a) and glia (b) in comparison to the whole RB derived stromal cell population of T18\_IM cells (ctr; white columns) as revealed by real-time PCR. (c) Immunofluorescence staining for different markers (red fluorescence) and DAPI counterstaining (blue fluorescence; scale bars: 100  $\mu$ m) of MACS separated stromal subpopulations of TAMs (CD163/CD68+) and glia (GFAP+).

**Supplementary table 1.** Primer sequences for the genes analyzed by real-time PCR analysis.

FW: forward primer, RV: reverse primer

| Gene   | Primer sequences (FW and RV) |
|--------|------------------------------|
| CRX    | 5'-CTCAGTGTCCCGAAGATCA-3'    |
|        | 5'-GGTACTGGGTCTTGGCAAAC-3'   |
| GAPDH  | 5'-ACCCACTCCTCCACCTTTGA-3'   |
|        | 5'-CTGTTGCTGTAGCCAAATTCGT-3' |
| SYK    | 5'-CCGTATGAGCCAGAATTGC-3'    |
|        | 5'-ACCAGAGCCCAGTCTTTGT-3'    |
| IMPG2  | 5'-TGGAAAACCATGGCCTTGTG-3'   |
|        | 5'-GCGTTGCCTGAAGACTTGAA-3'   |
| RCVRN  | 5'-CGGGACCATCAGCAAGAATG-3'   |
|        | 5'-CCAAGCACAGAGGGTCATTG-3'   |
| ARR3   | 5'-CGGGAATGGACAAAGAGCTG-3'   |
|        | 5'-CTTCCGCGTAAACTCCTCG-3'    |
| PDC    | 5'-ACCAGGCACAGAGATCCAAA-3'   |
|        | 5'-CTGAGGAGAAGACATTTGCCTG-3' |
| TULP1  | 5'-CCGTCATCATTCTGGCATG-3'    |
|        | 5'-CAGCGTGGACAATCTGGAAAG-3'  |
| GNMT2  | 5'-CTGTGTCTCTGTCCCTG-3'      |
|        | 5'-GCCCTAGACAGACCTGATCC-3'   |
| PDE6H  | 5'-ACAACACTACTCGCTGCT-3'     |
|        | 5'-GCCTCCCATGGACAAATCAC-3'   |
| CRB1   | 5'-AATGTAACCAAGGCTGTGC-3'    |
|        | 5'-ATCCACCACTGAACCTCC-3'     |
| RAX2   | 5'-ACTACCCGGATGTGTACAGC-3'   |
|        | 5'-TCGGGGAGTCTCGGAGCT-3'     |
| PROM1  | 5'-TTCTTGACCGACTGAGACCC-3'   |
|        | 5'-CCAAGCACAGAGGGTCATTG-3'   |
| CTGF   | 5'-TACCAATGACAACGCCTCCT-3'   |
|        | 5'-CCGTCGGTACATACTCCACA-3'   |
| KRT19  | 5'-CGCGACTACAGCCACTACTA-3'   |
|        | 5'-AGAGCCTGTTCCGTCTCAA-3'    |
| POSTN  | 5'-CCTTGAAGAGACGGTCACT-3'    |
|        | 5'-CTCAAAGACTGCTCCTCCA-3'    |
| COL1A1 | 5'-GCTACTACCGGGCTGATGAT-3'   |
|        | 5'-ACCAGTCTCCATGTTGCAGA-3'   |
| CCDC80 | 5'-TCTGATCACTGCTCCAAGG-3'    |
|        | 5'-CATCATCCCACTCGCATG-3'     |
| THBS1  | 5'-GCAAGTCACCCAGTCTACT-3'    |
|        | 5'-AATGAAACCCGTCTTGGCC-3'    |
| ACTG2  | 5'-CTGGCACCCTCTTCTACA-3'     |
|        | 5'-CAGAGGCATAGAGGGAGAGC-3'   |
| TGFB1  | 5'-CCTGAGAGACCTGCTGAACA-3'   |
|        | 5'-GTCTTGGCTGAGTCTGGGAT-3'   |
| COL1A2 | 5'-TAGAAAGAACCCAGCTCGCA-3'   |
|        | 5'-GGGATGTTTTAGGTTGGGC-3'    |
| FBN1   | 5'-GACATCAATCTGTGGGGTC-3'    |
|        | 5'-CAACACACTGGTCCACTGG-3'    |

**Supplementary table 2.** Antibodies used for immunofluorescence (IF) and immunohistochemical (IHC) stainings.

| Antibody                                | Clone                     | Dilution (IF) | Dilution (IHC) | Buffer (IHC)         |
|-----------------------------------------|---------------------------|---------------|----------------|----------------------|
| anti-alpha smooth muscle actin antibody | ab5694 (abcam)            | 1:100         | 1:1000         | EDTA buffer (pH9)    |
| GFAP                                    | ASTRO6 (Invitrogen)       | 1:100         | 1:500          | EDTA buffer (pH9)    |
| CD68                                    | KP1 (Invitrogen)          | 1:200         | 1:500          | EDTAbuffer (pH9)     |
| synaptophysin                           | YE269 (abcam)             | 1:100         | 1:600          | citrate buffer (pH6) |
| pan-cytokeratin                         | Sc-8018 (Santa Cruz)      | 1:100         | 1:100          | EDTA buffer (pH9)    |
| vimentin                                | Sc-6260 (Santa Cruz)      | 1:100         | 1:100          | EDTA buffer (pH9)    |
| VEGFR1                                  | PA5-32408 (Invitrogen)    | 1:100         | 1:200          | Citrate buffer (pH6) |
| TFF1                                    | ab92377 (abcam)           | 1:200         | 1:250          | Citrate buffer (pH6) |
| antinuclei                              | MAB1281 (Merck Millipore) | -             | 1:100          | Citrate buffer (pH6) |
| $\beta$ -Tubulin                        | TUB 2.1 (Sigma Aldrich)   | 1:200         | -              | -                    |

**Supplementary table 3.** Pathway gene enrichment analysis with the DEG selection of tumorspheres grown either in RB medium or MEGM medium. Shown are up to ten of the most significant GO terms and KEGG pathways analyzed by DAVID.

| <b>Go term category</b>        | <b>Tumorspheres in RB medium</b>                                          |                | <b>Tumorspheres in MEGM medium</b>     |                |
|--------------------------------|---------------------------------------------------------------------------|----------------|----------------------------------------|----------------|
| <b>Biological process (BP)</b> | <b>Term</b>                                                               | <b>P-Value</b> | <b>Term</b>                            | <b>P-Value</b> |
|                                | visual perception                                                         | 0.0000077      | axon guidance                          | 0.0005         |
|                                | cell adhesion                                                             | 0.0014         | kindey development                     | 0.0021         |
|                                | phototransduction                                                         | 0.0018         | negative chemotaxis                    | 0.0028         |
|                                | membrane repolarization                                                   | 0.0032         | response to xenobiotic stimulus        | 0.013          |
|                                | regulation of G-protein coupled receptor protein signaling pathway        | 0.006          | brain development                      | 0.017          |
|                                | retina development in camera-type eye                                     | 0.011          | response to drug                       | 0.023          |
|                                | positive regulation of Fc receptor mediated stimulators signaling pathway | 0.016          | neuron projection development          | 0.027          |
|                                | retina layer formation                                                    | 0.018          | neuron cell-cell adhesion              | 0.035          |
|                                | transmembrane receptor tyrosine kinase signaling pathway                  | 0.021          | cellular response to organic substance | 0.035          |
|                                | regulation of ERK1 and ERK2 cascade                                       | 0.022          |                                        |                |
| <b>Cell composition (CC)</b>   | <b>Term</b>                                                               | <b>P-Value</b> | <b>Term</b>                            | <b>P-Value</b> |
|                                | photoreceptor inner segment                                               | 0.0014         | integral component of membrane         | 0.0032         |
|                                | dentrite membrane                                                         | 0.0016         | plasma membrane                        | 0.0073         |
|                                | photoreceptor outer segment                                               | 0.0019         | cell surface                           | 0.013          |
|                                | synapse                                                                   | 0.011          |                                        |                |
|                                | lamelliopodium membrane                                                   | 0.012          |                                        |                |
|                                | focal adhesion                                                            | 0.015          |                                        |                |
|                                | plasma membrane                                                           | 0.016          |                                        |                |
|                                | dendric branch                                                            | 0.023          |                                        |                |
|                                | cell surface                                                              | 0.023          |                                        |                |
|                                | cell junction                                                             | 0.03           |                                        |                |
| <b>Molecular function (MF)</b> | <b>Term</b>                                                               | <b>P-Value</b> | <b>Term</b>                            | <b>P-Value</b> |
|                                | ion channel binding                                                       | 0.0044         | chemorepellent activity                | 0.0018         |
|                                | protein tyrosine kinase activity                                          | 0.01           | semaphorin receptor binding            | 0.049          |
|                                | histone demethylase activity                                              | 0.013          |                                        |                |
|                                | chemorepellent activity                                                   | 0.021          |                                        |                |
|                                | binding, bridging                                                         | 0.017          |                                        |                |
|                                | integrin binding                                                          | 0.035          |                                        |                |
| <b>KEGG pathways</b>           | <b>Category</b>                                                           | <b>P-Value</b> | <b>Category</b>                        | <b>P-Value</b> |
|                                | phosphatidylinositol signaling system                                     | 0.0082         | axon guidance                          | 0.0041         |
|                                | proximal tubule bicarbonate reclamation                                   | 0.015          |                                        |                |
|                                | thyroid hormone signaling pathway                                         | 0.017          |                                        |                |
|                                | inositol phosphate metabolism                                             | 0.022          |                                        |                |
|                                | arrhythmogenic right ventricular cardiomyopathy                           | 0.025          |                                        |                |
|                                | PI3K-Akt signaling pathway                                                | 0.026          |                                        |                |
|                                | ECM-receptor interaction                                                  | 0.036          |                                        |                |
|                                | GABAeric synapse                                                          | 0.037          |                                        |                |
|                                | AGE-RAGE signaling pathway in diabetic complications                      | 0.049          |                                        |                |

**Supplementary table 4.** Pathway gene enrichment analysis with the DEG selection of stroma-like RB derived cells and tumorspheres both grown in RB medium. Shown are up to ten of the most significant GO terms and related diseases analyzed by DAVID.

| <b>GO term category</b>        | <b>Stroma-like RB derived cells</b>         |                | <b>Tumorspheres in RB medium</b>                   |                |
|--------------------------------|---------------------------------------------|----------------|----------------------------------------------------|----------------|
| <b>Biological process (BP)</b> | <b>Term</b>                                 | <b>P-Value</b> | <b>Term</b>                                        | <b>P-Value</b> |
|                                | angiogenesis                                | 1.3 E-24       | visual perception                                  | 2.4 E-21       |
|                                | positive regulation of cell migration       | 1.9 E-23       | chemical synaptic transmission                     | 2.5 E-20       |
|                                | cell adhesion                               | 1.1 E-19       | potassium ion transmembrane transport              | 5.1 E-14       |
|                                | collagen fibril organisation                | 1.5 E17        | nervous system development                         | 6.7 E-14       |
|                                | cell migration                              | 2.5 E-17       | regulation of ion transmembrane transport          | 1.1 E-12       |
|                                | wound healing                               | 2.5 E-16       | regulation of membrane potential                   | 3.1 E-12       |
|                                | positive regulation of gene expression      | 5.8 E-15       | axon guidance                                      | 1.5 E-9        |
|                                | extracellular matrix organization           | 3.9 E-14       | brain development                                  | 2.8 E-9        |
|                                | signal transduction                         | 2.7 E-13       | synapse assembly                                   | 4.9 E-9        |
|                                | negative regulation of apoptotic process    | 6.9 E-12       | retina development in camera-type eyes             | 7.0 E-6        |
| <b>Cell composition (CC)</b>   | <b>Term</b>                                 | <b>P-Value</b> | <b>Term</b>                                        | <b>P-Value</b> |
|                                | extracellular exosome                       | 2.9 E-73       | photoreceptor inner segment                        | 1.6 E-23       |
|                                | focal adhesion                              | 2.1 E-59       | glutamatergic synapse                              | 1.1 E-22       |
|                                | endoplasmatic reticulum lumen               | 5.2 E-33       | synapse assembly                                   | 5.1 E-22       |
|                                | cytosol                                     | 6.4 E-27       | axon guidance                                      | 2.0 E-21       |
|                                | extracellular region                        | 6.4 E-27       | neuron projection                                  | 2.2 E-21       |
|                                | cell surface                                | 6.9 E-26       | dendrite                                           | 1.8 E-18       |
|                                | membrane                                    | 7.2 E-25       | postsynaptic density                               | 1.1 E-17       |
|                                | plasma membrane                             | 3.6 E-24       | neuronal cell body                                 | 5.5 E-17       |
|                                | extracellular matrix                        | 1.7 E-23       | dendric spine                                      | 9.8 E-14       |
|                                | golgi apparatus                             | 2.3 E-21       | photoreceptor outer segment                        | 2.0 E-12       |
| <b>Molecular function (MF)</b> | <b>Term</b>                                 | <b>P-Value</b> | <b>Term</b>                                        | <b>P-Value</b> |
|                                | protein binding                             | 1.5 E-32       | voltage-gated potassium channel activity           | 1.0 E-12       |
|                                | extracellular matrix structural constituent | 4.3 E-22       | calmodulin binding                                 | 8.1 E-10       |
|                                | cadherin binding                            | 4.9 E-19       | microtubule binding                                | 1.9 E-9        |
|                                | integrin binding                            | 5.7 E-19       | calcium ion binding                                | 1.6 E-8        |
|                                | collagen binding                            | 1.3 E-15       | ligand-gated ion channel activity                  | 8.3 E-7        |
|                                | actin binding                               | 1.4 E-14       | ATP-dependent microtubule motor activity           | 7.2 E-6        |
|                                | identical protein binding                   | 2.6 E-13       | delayed rectifier potassium channel ctivity        | 8.5 E-6        |
|                                | protein homodimerization activity           | 3.0 E-13       | GTPase activator activity                          | 1.4 E-5        |
|                                | calcium ion binding                         | 9.5 E-13       | 3',5'-cyclic-nucleotide phosphodiesterase activity | 2.1 E-5        |
|                                | actin filament binding                      | 2.0 E-10       | potassium channel activity                         | 3.6 E-5        |
| <b>Disease</b>                 | <b>Term</b>                                 | <b>P-Value</b> | <b>Term</b>                                        | <b>P-Value</b> |
|                                |                                             |                | retinitis pigmentosa                               | 4.4 E-7        |
|                                |                                             |                | cone-rod dystrophy                                 | 1.3 E-5        |
|                                |                                             |                | congenital stationary night blindness              | 1.9 E-2        |

**Supplementary table 5.** RB tumor and stromal marker expression.

| RB tumor marker set | RB tumorspheres | RB cell lines |
|---------------------|-----------------|---------------|
| CRX                 | expressed       | expressed     |
| SYK                 | expressed       | expressed     |
| IMPG2               | expressed       | expressed     |
| RCVRN               | expressed       | expressed     |
| ARR3                | expressed       | expressed     |
| PDC                 | expressed       | expressed     |
| TULP1               | expressed       | expressed     |
| GNGT2               | expressed       | not expressed |
| PDE6H               | expressed       | expressed     |
| CRB1                | expressed       | not expressed |
| RAX2                | expressed       | not expressed |
| PROM1               | expressed       | expressed     |

| RB stromal marker set | RB stromal cells | TAM [CD163+]* | Glia [GFAP+]* | RB cell lines |
|-----------------------|------------------|---------------|---------------|---------------|
| CTGF                  | expressed        | decreased     | increased     | not expressed |
| KRT19                 | expressed        | decreased     | increased     | not expressed |
| POSTN                 | expressed        | increased     | increased     | not expressed |
| COL1A1                | expressed        | increased     | increased     | expressed     |
| CCDC80                | expressed        | increased     | increased     | not expressed |
| THBS1                 | expressed        | increased     | increased     | not expressed |
| ACTG2                 | expressed        | decreased     | decreased     | not expressed |
| TGFBI                 | expressed        | increased     | decreased     | not expressed |
| COL1A2                | expressed        | increased     | decreased     | not expressed |
| FBN1                  | expressed        | increased     | decreased     | not expressed |

\*compared to bulk RB stromal cells
